# Supplementary material
Source: PubMed Central journal article supplement (PMC4886293)
Supplement: supp_tpw022_tpw022supp.pdf [file supp_tpw022_tpw022supp.pdf]

## Supplementary Material

Supplemental Tab. S1 - 95% confidence intervals for coefficients “a” (intercept) and “b” (slope) of the equations shown in Figs. 2-4. Locations are field or greenhouse (GH) and treatments are nutrient addition (N+) or not (N-) for field experiment and three levels of N addition (1N, 3N, 10N) for the homogeneous (hom) and heterogeneous (het) treatments in the GH experiment.

| Figure                            | Location | Treatment | a-coefficient |        | b-coefficient |           |
|-----------------------------------|----------|-----------|---------------|--------|---------------|-----------|
|                                   |          |           | (intercept)   |        | (slope)       |           |
|                                   |          |           | 2.50%         | 97.50% | 2.50%         | 97.50%    |
| <b>N% vs. age</b><br>(Fig. 2 A+B) | field    | N-        | 2.182         | 2.605  | -0.016        | -0.012    |
|                                   |          | N+        | 2.218         | 2.577  | -0.011        | -0.007    |
|                                   | GH       | 1N        | 1.782         | 2.297  | -0.004        | 9.265e-06 |
|                                   |          | 3N        | 2.384         | 2.792  | -0.006        | -0.003    |
|                                   |          | 10N       | 2.846         | 3.291  | -0.005        | -0.002    |
| <b>Resp. vs. N%</b><br>(Fig. 3)   | field    | N-        | -6.042        | 2.305  | 2.647         | 8.406     |
|                                   |          | N+        | -5.497        | 0.742  | 3.181         | 6.904     |
|                                   | GH       | 1N (hom)  | -10.584       | 7.817  | -0.685        | 9.183     |
|                                   |          | 3N (hom)  | -19.629       | -0.322 | 3.626         | 12.502    |
|                                   |          | 10N (hom) | -18.681       | 1.832  | 1.986         | 9.635     |
| <b>Resp. vs. age</b><br>(Fig. 4)  | field    | N-        | 9.073         | 13.678 | -0.022        | -0.011    |
|                                   |          | N+        | 11.103        | 20.405 | -0.039        | -0.017    |
|                                   | GH       | 1N (hom)  | 8.774         | 16.245 | -0.023        | -0.007    |
|                                   |          | 3N (hom)  | 10.067        | 16.786 | -0.027        | -0.009    |
|                                   |          | 10N (hom) | 13.094        | 18.462 | -0.033        | -0.016    |
|                                   |          | 1N (het)  | 10.217        | 21.305 | -0.063        | -0.011    |
|                                   |          | 3N (het)  | 7.708         | 14.208 | -0.019        | -0.004    |
| 10N (het)                         | 14.552   | 24.332    | -0.064        | -0.017 |               |           |
